# Supplementary material for: Three-dimensional inverse modeling of EM-LIN data for the exploration of coastal sinkholes in Quintana Roo, Mexico
Source: Copernicus journal article supplement (doi:10.5194/nhess-19-1779-2019), 2019-08-15
Supplement: Supplementary file 1 [file nhess-19-1779-2019-supplement.zip]

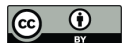

## *Supplement of*

# **Three-dimensional inverse modeling of EM-LIN data for the exploration of coastal sinkholes in Quintana Roo, Mexico**

**Marco A. Perez-Flores et al.**

*Correspondence to:* Marco A. Perez-Flores ([mperez@cicese.mx](mailto:mperez@cicese.mx))

- [nhess-19-1779-2019-supplement-title-page.pdf](#)
- [EMLIN-Data-Chac-Mool.dat](#)

The copyright of individual parts of the supplement might differ from the CC BY 4.0 License.
